# Supplementary material for: Exploration of the Pathogenesis of Chronic Obstructive Pulmonary Disease Caused by Smoking—Based on Bioinformatics Analysis and In Vitro Experimental Evidence
Source: MDPI journal article supplement (doi:10.3390/toxics11120995), 2023-12-07
Supplement: s1 [file s1]

# Exploration of the pathogenesis of chronic obstructive pulmonary disease caused by smoking - based on bioinformatics analysis and in vitro experimental evidence

**Table S1** Differentially expressed miRNAs screened in GSE61741

| <b>miRNA ID</b> | <b>P. Value</b> | <b><i>t</i></b> | <b>Fold Change</b> |
|-----------------|-----------------|-----------------|--------------------|
| hsa-miR-186     | 0.0000254       | -7.01396        | -5.76439           |
| hsa-miR-512-3p  | 0.00332997      | -3.75357        | -4.98003           |
| hsa-miR-323-3p  | 0.00000241      | -9.04048        | -4.90256           |
| hsa-miR-1911    | 0.00085739      | -4.5694         | -4.20588           |
| hsa-miR-769-5p  | 0.00849951      | -3.21406        | -4.19922           |
| hsa-miR-499-5p  | 0.00040106      | -5.0514         | -4.10695           |
| hsa-miR-1255b   | 0.00199905      | -4.0546         | -4.08811           |
| hsa-miR-208a    | 0.00128004      | -4.32305        | -3.95525           |
| hsa-miR-200c    | 0.04102785      | -2.32144        | -3.85142           |
| hsa-miR-561     | 0.00242359      | -3.94027        | -3.83581           |
| hsa-miR-614     | 0.03113285      | -2.47884        | -3.8294            |
| hsa-miR-27a     | 0.0106894       | -3.08386        | -3.81711           |
| hsa-miR-1       | 0.03885861      | -2.35252        | -3.808             |
| hsa-miR-491-5p  | 0.00803065      | -3.24636        | -3.69734           |
| hsa-miR-518b    | 0.01413329      | -2.92576        | -3.64701           |
| hsa-miR-657     | 0.00209782      | -4.02588        | -3.63514           |
| hsa-miR-431     | 0.00833233      | -3.22536        | -3.60055           |
| hsa-miR-300     | 0.00243549      | -3.93737        | -3.4712            |
| hsa-miR-1254    | 0.01131553      | -3.0516         | -3.46762           |
| hsa-miR-504     | 0.00251599      | -3.91816        | -3.46715           |
| hsa-miR-519a    | 0.00404173      | -3.64081        | -3.4439            |
| hsa-miR-802     | 0.00607572      | -3.40577        | -3.39985           |
| hsa-miR-1252    | 0.04819781      | -2.22896        | -3.39717           |

|                |            |          |          |
|----------------|------------|----------|----------|
| hsa-miR-526b   | 0.00252537 | -3.91596 | -3.39035 |
| hsa-miR-1264   | 0.0094982  | -3.1509  | -3.31222 |
| hsa-miR-148b   | 0.03458335 | -2.41903 | -3.28052 |
| hsa-miR-337-5p | 0.00661079 | -3.35743 | -3.25833 |
| hsa-miR-122    | 0.00924597 | -3.16619 | -3.25268 |
| hsa-miR-549    | 0.01151488 | -3.0417  | -3.25185 |
| hsa-miR-369-5p | 0.010344   | -3.10249 | -3.24728 |
| hsa-miR-517b   | 0.01243398 | -2.99822 | -3.09424 |
| hsa-miR-577    | 0.01867111 | -2.76838 | -3.09041 |
| hsa-miR-518c   | 0.0121536  | -3.01113 | -3.08991 |
| hsa-miR-200a   | 0.02108858 | -2.69956 | -2.89018 |
| hsa-miR-519d   | 0.02668692 | -2.56629 | -2.80153 |
| hsa-miR-548f   | 0.02735766 | -2.55222 | -2.79142 |
| hsa-miR-571    | 0.02546857 | -2.59277 | -2.77869 |
| hsa-miR-505    | 0.00639863 | -3.3761  | -2.77367 |
| hsa-miR-555    | 0.02747142 | -2.54987 | -2.64734 |
| hsa-miR-145    | 0.04620932 | -2.25321 | -2.5211  |
| hsa-miR-320b   | 0.0335543  | -2.43623 | -2.41105 |
| hsa-miR-218-1  | 0.00141225 | -4.26337 | -1.96204 |
| hsa-miR-129-3p | 0.02425449 | -2.62043 | -1.84643 |
| hsa-miR-146a   | 0.00956206 | -3.1471  | -1.82605 |
| hsa-miR-1273   | 0.00102541 | -4.45877 | -1.8007  |
| hsa-miR-181a   | 0.02178682 | -2.68114 | -1.59447 |
| hsa-miR-424    | 0.01503173 | -2.89091 | -1.59053 |
| hsa-miR-222    | 0.03413607 | -2.42644 | -1.57372 |
| hsa-miR-940    | 0.0150171  | -2.89146 | -1.57191 |
| hsa-miR-708    | 0.03752982 | -2.3724  | -1.55714 |
| hsa-miR-454    | 0.01083791 | -3.07604 | -1.49214 |
| hsa-miR-639    | 0.00378112 | -3.67952 | -1.48297 |

|                |            |          |          |
|----------------|------------|----------|----------|
| hsa-miR-875-3p | 0.01363771 | -2.94594 | -1.42802 |
| hsa-miR-320a   | 0.01494268 | -2.89427 | -1.2759  |
| hsa-miR-212    | 0.03856591 | -2.35684 | -1.25194 |
| hsa-miR-423-5p | 0.02959062 | -2.5077  | -1.2512  |
| hsa-miR-1539   | 0.02447112 | -2.6154  | -1.19216 |
| hsa-miR-938    | 0.03969399 | -2.34036 | -1.16935 |
| hsa-miR-487b   | 0.04022836 | -2.33271 | -1.16549 |
| hsa-miR-619    | 0.02304612 | -2.64935 | -1.09638 |
| hsa-miR-151-5p | 0.04396192 | -2.28185 | -1.03891 |
| hsa-miR-582-3p | 0.04294388 | -2.29529 | -1.03664 |
| hsa-miR-107    | 0.04413759 | -2.27956 | -1.03614 |
| hsa-miR-1205   | 0.03507889 | -2.41092 | -1.02274 |
| hsa-miR-191    | 0.04340821 | 2.28912  | 1.01564  |
| hsa-miR-20a    | 0.02908433 | 2.5175   | 1.1022   |
| hsa-miR-374b   | 0.04971338 | 2.21112  | 1.15006  |
| hsa-miR-103-as | 0.00835606 | 3.22374  | 1.19401  |
| hsa-miR-362-3p | 0.04946055 | 2.21406  | 1.28041  |
| hsa-miR-21     | 0.01012335 | 3.11472  | 1.34113  |
| hsa-miR-1228   | 0.0447105  | 2.27216  | 1.40329  |
| hsa-miR-1282   | 0.02662069 | 2.5677   | 1.42375  |
| hsa-miR-1183   | 0.00749499 | 3.28572  | 1.6494   |
| hsa-miR-196b   | 0.02218057 | 2.67101  | 1.70758  |
| hsa-miR-1268   | 0.04925273 | 2.21649  | 1.80464  |
| hsa-miR-150    | 0.0417892  | 2.31091  | 2.2422   |
| hsa-miR-892b   | 0.02992748 | 2.50127  | 2.68326  |
| hsa-miR-1178   | 0.04661436 | 2.24819  | 3.0375   |
| hsa-miR-1250   | 0.03411849 | 2.42674  | 3.12815  |
| hsa-miR-609    | 0.03768483 | 2.37004  | 3.14176  |
| hsa-miR-649    | 0.04217521 | 2.30564  | 3.65893  |

|                 |            |         |         |
|-----------------|------------|---------|---------|
| hsa-miR-608     | 0.04565771 | 2.26011 | 3.89685 |
| hsa-miR-601     | 0.01522354 | 2.88375 | 3.91936 |
| hsa-miR-125b-1  | 0.03189772 | 2.46504 | 4.00425 |
| hsa-miR-483-3p  | 0.03029464 | 2.49435 | 4.2463  |
| hsa-miR-432     | 0.01794141 | 2.79091 | 4.32925 |
| hsa-miR-924     | 0.04358246 | 2.28682 | 4.3489  |
| hsa-miR-1294    | 0.03457762 | 2.41912 | 4.35228 |
| hsa-miR-509-3p  | 0.03429698 | 2.42377 | 4.53428 |
| hsa-miR-92a-2   | 0.03719758 | 2.37747 | 4.53484 |
| hsa-miR-520d-3p | 0.00033675 | 5.16532 | 4.85648 |
| hsa-miR-1265    | 0.00620709 | 3.3935  | 4.87651 |
| hsa-miR-23a     | 0.00145347 | 4.24596 | 5.0879  |
| hsa-miR-1182    | 0.00747057 | 3.28758 | 5.18938 |
| hsa-miR-1293    | 0.00947399 | 3.15235 | 5.26636 |
| hsa-miR-30b     | 0.0075811  | 3.2792  | 5.53105 |
| hsa-miR-382     | 0.01174091 | 3.03069 | 5.56834 |
| hsa-miR-187     | 0.00009454 | 6.03263 | 5.75508 |
| hsa-miR-206     | 0.0003818  | 5.08335 | 5.90213 |

**Table S2** Differentially expressed miRNAs screened in GSE38974

| <b>miRNA ID</b> | <b>P.Value</b> | <b><i>t</i></b> | <b>Fold Change</b> |
|-----------------|----------------|-----------------|--------------------|
| hsa-miR-223     | 8.65E-04       | -3.718864       | -1.5497869         |
| hsa-miR-1274a   | 1.45E-10       | -9.707161       | -1.4502034         |
| hsa-miR-105     | 3.47E-06       | -5.732266       | -1.2538584         |
| hsa-miR-144     | 3.42E-03       | -3.191856       | -1.2501907         |
| hsa-miR-374a    | 1.96E-04       | -4.267951       | -1.1717795         |
| hsa-miR-664     | 7.19E-09       | -8.076569       | -1.1455395         |
| hsa-miR-148a    | 1.23E-07       | -6.970708       | -1.1072064         |
| hsa-miR-454     | 3.49E-05       | -4.894987       | -1.0824868         |
| hsa-miR-766     | 8.44E-06       | -5.408915       | -1.0433065         |
| hsa-miR-486-5p  | 3.48E-04       | -4.057146       | -1.0377131         |
| hsa-miR-10a     | 8.25E-04       | -3.736372       | -1.0370846         |
| hsa-miR-25      | 7.44E-08       | 7.162854        | 1.0064691          |
| hsa-miR-513a-5p | 3.83E-04       | 4.021855        | 1.0413164          |
| hsa-miR-576-3p  | 9.73E-07       | 6.198082        | 1.0458673          |
| hsa-miR-422a    | 9.82E-07       | 6.194711        | 1.0867528          |
| hsa-miR-937     | 1.75E-06       | 5.983008        | 1.2370675          |
| hsa-miR-923     | 9.71E-06       | 5.358115        | 2.3397962          |

**Table S3** Differentially expressed miRNAs screened in GSE136390

| <b>miRNA ID</b> | <b>P.Value</b> | <b><i>t</i></b> | <b>Fold Change</b> |
|-----------------|----------------|-----------------|--------------------|
| hsa-miR-508     | 0.0002852      | -4.7665         | -11.0991           |
| hsa-miR-499     | 0.00013448     | -5.1659         | -10.8272           |
| hsa-miR-888     | 0.00003617     | -5.892          | -10.7229           |
| hsa-miR-220     | 0.00009246     | -5.3692         | -10.2322           |
| hsa-miR-525     | 0.00027523     | -4.7852         | -10.1867           |
| hsa-miR-522     | 0.0001323      | -5.1747         | -8.8391            |
| hsa-miR-302c    | 0.00054109     | -4.4339         | -8.7587            |
| hsa-miR-217     | 0.00052613     | -4.4484         | -8.6089            |
| hsa-miR-380     | 0.00406902     | -3.4166         | -7.9154            |
| hsa-miR-519c    | 0.00005674     | -5.6386         | -5.9487            |
| hsa-miR-520d    | 0.0231197      | -2.5439         | -5.1456            |
| hsa-miR-346     | 0.02569676     | -2.4896         | -5.0467            |
| hsa-miR-302a    | 0.00423115     | -3.3971         | -4.6997            |
| hsa-miR-520e    | 0.00166323     | -3.8637         | -4.564             |
| hsa-miR-518f    | 0.00016988     | -5.0406         | -3.9984            |
| hsa-miR-365     | 0.00067921     | -4.3173         | -3.9713            |
| hsa-miR-488     | 0.04425561     | -2.2058         | -3.6833            |
| hsa-miR-183     | 0.02390664     | -2.5267         | -2.6127            |
| hsa-miR-215     | 0.02571918     | -2.4892         | -2.4847            |
| hsa-miR-34c     | 0.03367085     | -2.3496         | -2.3463            |
| hsa-miR-143     | 0.01623968     | -2.7238         | -1.6454            |
| hsa-miR-582     | 0.04226817     | -2.2302         | -1.5657            |
| hsa-miR-192     | 0.0410484      | 2.2456          | 1.0559             |
| hsa-miR-100     | 0.02744381     | 2.4557          | 1.1298             |
| hsa-miR-423     | 0.03971366     | 2.2631          | 1.1817             |
| hsa-miR-130b    | 0.02449455     | 2.5142          | 1.2496             |
| hsa-miR-199a    | 0.03953347     | 2.2655          | 1.3327             |
| hsa-miR-485     | 0.03423642     | 2.3409          | 1.3931             |

|              |            |        |        |
|--------------|------------|--------|--------|
| hsa-miR-125b | 0.01556013 | 2.7454 | 1.4877 |
| hsa-miR-323  | 0.02303637 | 2.5457 | 1.5601 |
| hsa-miR-342  | 0.01408559 | 2.7957 | 1.5711 |
| hsa-miR-95   | 0.03809234 | 2.285  | 1.5719 |
| hsa-miR-146a | 0.01366206 | 2.8111 | 1.6157 |
| hsa-miR-193b | 0.00690796 | 3.1528 | 1.6318 |
| hsa-miR-146b | 0.01068278 | 2.9348 | 1.6434 |
| hsa-miR-141  | 0.00768493 | 3.0996 | 1.6809 |
| hsa-miR-342  | 0.0156775  | 2.7416 | 1.7966 |
| hsa-miR-708  | 0.0373855  | 2.2948 | 1.797  |
| hsa-miR-138  | 0.0195328  | 2.63   | 1.804  |
| hsa-miR-135b | 0.02593632 | 2.4848 | 1.8633 |
| hsa-miR-29b  | 0.01207597 | 2.8733 | 1.9251 |
| hsa-miR-150  | 0.00596093 | 3.2263 | 1.9328 |
| hsa-miR-154  | 0.03938708 | 2.2674 | 1.9448 |
| hsa-miR-545  | 0.00953911 | 2.9916 | 1.967  |
| hsa-miR-139  | 0.0020942  | 3.7482 | 2.2497 |
| hsa-miR-31   | 0.00349703 | 3.4921 | 2.4512 |
| hsa-miR-337  | 0.00166186 | 3.8641 | 2.7264 |
| hsa-miR-376b | 0.03729095 | 2.2961 | 2.7373 |
| hsa-miR-493  | 0.0380032  | 2.2862 | 3.357  |
| hsa-miR-184  | 0.00244203 | 3.6713 | 3.7598 |
| hsa-miR-302b | 0.00100191 | 4.1194 | 4.0133 |
| hsa-miR-642  | 0.00000464 | 7.1178 | 5.4759 |
| hsa-miR-874  | 0.00000215 | 7.6127 | 7.8684 |

Table S4 Quantitative data for PPI analysis

| Node1     | Ensembl ID      | Node2         | Ensembl ID      | Interaction score |
|-----------|-----------------|---------------|-----------------|-------------------|
| AIFM2     | ENSP00000478931 | TP53          | ENSP00000269305 | 0.931             |
| BCAT1     | ENSP00000443459 | PSAT1         | ENSP00000365773 | 0.541             |
| CBL       | ENSP00000264033 | CORO1C        | ENSP00000394496 | 0.468             |
| CBL       | ENSP00000264033 | RAP1B         | ENSP00000250559 | 0.907             |
| CORO1C    | ENSP00000394496 | CBL           | ENSP00000264033 | 0.468             |
| DDX3X     | ENSP00000382840 | HNRNPA0       | ENSP00000316042 | 0.455             |
| DDX3X     | ENSP00000382840 | SP1           | ENSP00000329357 | 0.462             |
| DDX3X     | ENSP00000382840 | TP53          | ENSP00000269305 | 0.693             |
| EGR2      | ENSP00000242480 | EP300         | ENSP00000263253 | 0.924             |
| EGR2      | ENSP00000242480 | HIST2H2BE     | ENSP00000358151 | 0.91              |
| EGR2      | ENSP00000242480 | Gene homologs | ENSP00000339992 | 0.418             |
| EGR2      | ENSP00000242480 | SH3TC2        | ENSP00000423660 | 0.58              |
| EGR2      | ENSP00000242480 | TP53          | ENSP00000269305 | 0.446             |
| EP300     | ENSP00000263253 | EGR2          | ENSP00000242480 | 0.924             |
| EP300     | ENSP00000263253 | HIST2H2BE     | ENSP00000358151 | 0.975             |
| EP300     | ENSP00000263253 | MAPK1         | ENSP00000215832 | 0.688             |
| EP300     | ENSP00000263253 | Gene homologs | ENSP00000339992 | 0.991             |
| EP300     | ENSP00000263253 | NR2F2         | ENSP00000377721 | 0.735             |
| EP300     | ENSP00000263253 | PRKCA         | ENSP00000408695 | 0.515             |
| EP300     | ENSP00000263253 | SP1           | ENSP00000329357 | 0.972             |
| EP300     | ENSP00000263253 | TP53          | ENSP00000269305 | 0.999             |
| EP300     | ENSP00000263253 | ZB1           | ENSP00000354487 | 0.644             |
| EPHB2     | ENSP00000363763 | MAPK1         | ENSP00000215832 | 0.565             |
| EPHB2     | ENSP00000363763 | TP53          | ENSP00000269305 | 0.654             |
| GOSR1     | ENSP00000225724 | TP53          | ENSP00000269305 | 0.483             |
| GOSR1     | ENSP00000225724 | VPS53         | ENSP00000401435 | 0.574             |
| HIST1H2AE | ENSP00000303373 | HIST2H2BE     | ENSP00000358151 | 0.789             |
| HIST2H2BE | ENSP00000358151 | EGR2          | ENSP00000242480 | 0.91              |
| HIST2H2BE | ENSP00000358151 | EP300         | ENSP00000263253 | 0.975             |
| HIST2H2BE | ENSP00000358151 | HIST1H2AE     | ENSP00000303373 | 0.789             |
| HIST2H2BE | ENSP00000358151 | TP53          | ENSP00000269305 | 0.542             |
| HNRNPA0   | ENSP00000316042 | DDX3X         | ENSP00000382840 | 0.455             |
| MAPK1     | ENSP00000215832 | EP300         | ENSP00000263253 | 0.688             |
| MAPK1     | ENSP00000215832 | EPHB2         | ENSP00000363763 | 0.565             |
| MAPK1     | ENSP00000215832 | Gene homologs | ENSP00000339992 | 0.715             |
| MAPK1     | ENSP00000215832 | PRKCA         | ENSP00000408695 | 0.941             |
| MAPK1     | ENSP00000215832 | RAP1B         | ENSP00000250559 | 0.937             |
| MAPK1     | ENSP00000215832 | SP1           | ENSP00000329357 | 0.966             |
| MAPK1     | ENSP00000215832 | TP53          | ENSP00000269305 | 0.985             |



|                  |                 |                  |                 |       |
|------------------|-----------------|------------------|-----------------|-------|
| MAPK1            | ENSP00000215832 | ZB1              | ENSP00000354487 | 0.406 |
| MMP14            | ENSP00000308208 | TP53             | ENSP00000269305 | 0.515 |
| MMP14            | ENSP00000308208 | ZB1              | ENSP00000354487 | 0.418 |
| Gene<br>homologs | ENSP00000339992 | EGR2             | ENSP00000242480 | 0.418 |
| Gene<br>homologs | ENSP00000339992 | EP300            | ENSP00000263253 | 0.991 |
| Gene<br>homologs | ENSP00000339992 | MAPK1            | ENSP00000215832 | 0.715 |
| Gene<br>homologs | ENSP00000339992 | PDCD4            | ENSP00000280154 | 0.552 |
| Gene<br>homologs | ENSP00000339992 | TP53             | ENSP00000269305 | 0.955 |
| NR2F2            | ENSP00000377721 | EP300            | ENSP00000263253 | 0.735 |
| PDCD4            | ENSP00000280154 | Gene<br>homologs | ENSP00000339992 | 0.552 |
| PDCD4            | ENSP00000280154 | TP53             | ENSP00000269305 | 0.714 |
| PDCD4            | ENSP00000280154 | ZB1              | ENSP00000354487 | 0.477 |
| PRKCA            | ENSP00000408695 | EP300            | ENSP00000263253 | 0.515 |
| PRKCA            | ENSP00000408695 | MAPK1            | ENSP00000215832 | 0.941 |
| PRKCA            | ENSP00000408695 | TP53             | ENSP00000269305 | 0.629 |
| PSAT1            | ENSP00000365773 | BCAT1            | ENSP00000443459 | 0.541 |
| RAB8A            | ENSP00000300935 | RAP1B            | ENSP00000250559 | 0.87  |
| RAP1B            | ENSP00000250559 | CBL              | ENSP00000264033 | 0.907 |
| RAP1B            | ENSP00000250559 | MAPK1            | ENSP00000215832 | 0.937 |
| RAP1B            | ENSP00000250559 | RAB8A            | ENSP00000300935 | 0.87  |
| RNF125           | ENSP00000217740 | TP53             | ENSP00000269305 | 0.406 |
| SH3TC2           | ENSP00000423660 | EGR2             | ENSP00000242480 | 0.58  |
| SP1              | ENSP00000329357 | DDX3X            | ENSP00000382840 | 0.462 |
| SP1              | ENSP00000329357 | EP300            | ENSP00000263253 | 0.972 |
| SP1              | ENSP00000329357 | MAPK1            | ENSP00000215832 | 0.966 |
| SP1              | ENSP00000329357 | TP53             | ENSP00000269305 | 0.987 |
| SP1              | ENSP00000329357 | ZBTB7A           | ENSP00000323670 | 0.508 |
| TP53             | ENSP00000269305 | AIFM2            | ENSP00000478931 | 0.931 |
| TP53             | ENSP00000269305 | DDX3X            | ENSP00000382840 | 0.693 |
| TP53             | ENSP00000269305 | EGR2             | ENSP00000242480 | 0.446 |
| TP53             | ENSP00000269305 | EP300            | ENSP00000263253 | 0.999 |
| TP53             | ENSP00000269305 | EPHB2            | ENSP00000363763 | 0.654 |
| TP53             | ENSP00000269305 | GOSR1            | ENSP00000225724 | 0.483 |
| TP53             | ENSP00000269305 | HIST2H2BE        | ENSP00000358151 | 0.542 |
| TP53             | ENSP00000269305 | MAPK1            | ENSP00000215832 | 0.985 |
| TP53             | ENSP00000269305 | MMP14            | ENSP00000308208 | 0.515 |
| TP53             | ENSP00000269305 | Gene<br>homologs | ENSP00000339992 | 0.955 |

|        |                 |        |                 |       |
|--------|-----------------|--------|-----------------|-------|
| TP53   | ENSP00000269305 | PDCD4  | ENSP00000280154 | 0.714 |
| TP53   | ENSP00000269305 | PRKCA  | ENSP00000408695 | 0.629 |
| TP53   | ENSP00000269305 | RNF125 | ENSP00000217740 | 0.406 |
| TP53   | ENSP00000269305 | SP1    | ENSP00000329357 | 0.987 |
| TP53   | ENSP00000269305 | ZBTB7A | ENSP00000323670 | 0.769 |
| TP53   | ENSP00000269305 | ZB1    | ENSP00000354487 | 0.665 |
| VPS53  | ENSP00000401435 | GOSR1  | ENSP00000225724 | 0.574 |
| ZBTB7A | ENSP00000323670 | SP1    | ENSP00000329357 | 0.508 |
| ZBTB7A | ENSP00000323670 | TP53   | ENSP00000269305 | 0.769 |
| ZB1    | ENSP00000354487 | EP300  | ENSP00000263253 | 0.644 |
| ZB1    | ENSP00000354487 | MAPK1  | ENSP00000215832 | 0.406 |
| ZB1    | ENSP00000354487 | MMP14  | ENSP00000308208 | 0.418 |
| ZB1    | ENSP00000354487 | PDCD4  | ENSP00000280154 | 0.477 |
| ZB1    | ENSP00000354487 | TP53   | ENSP00000269305 | 0.665 |
